# Supplementary material for: Adaptive threshold-based alarm strategies for continuous vital signs monitoring
Source: Springer Nature journal article supplement (doi:10.1007/s10877-021-00666-4), 2021-02-11
Supplement: MOESM1 [file 18858416]

Supplementary file 1

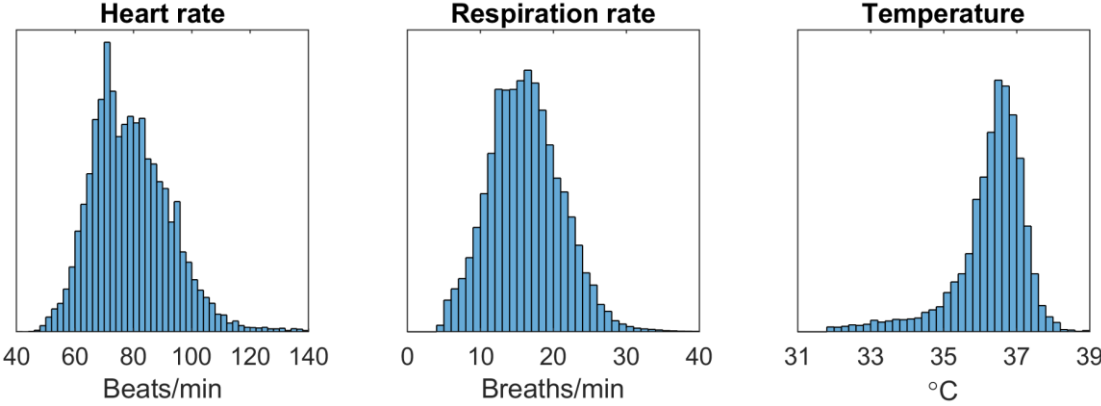

**Fig. 3** Distribution of continuous heart rate, respiratory rate, and temperature measurements obtained in the included surgical ward patients (N = 39)
