# Supplementary material for: Adaptive threshold-based alarm strategies for continuous vital signs monitoring
Source: Springer Nature journal article supplement (doi:10.1007/s10877-021-00666-4), 2021-02-11
Supplement: MOESM2 [file 18858416]

## Supplementary file 2

**Table 6** Performance of original and alternative alarm strategies

| Strategy                                         | Parameter setting                                                             | $S_{\text{early}}$<br>(% of AEs preceded by $TP_{\text{early}}$ alarms) | $S_{\text{total}}$<br>(% of AEs with TP alarms) | Total alarm rate<br>(alarms/patient/day) | False detection rate<br>(% of alarms classified as false positive) | P-score |
|--------------------------------------------------|-------------------------------------------------------------------------------|-------------------------------------------------------------------------|-------------------------------------------------|------------------------------------------|--------------------------------------------------------------------|---------|
| Original                                         | Default                                                                       | 39                                                                      | 61                                              | 0.49                                     | 59                                                                 | N.A.    |
| I. Threshold individualization                   | $CDF_{\text{low}}$ : 0.1%<br>$CDF_{\text{high}}$ : 99.9%                      | 44                                                                      | 61                                              | 0.92                                     | 84                                                                 | -1      |
|                                                  | $CDF_{\text{low}}$ : 0.5%<br>$CDF_{\text{high}}$ : 99.5%                      | 50                                                                      | 67                                              | 1.44                                     | 84                                                                 | 0       |
|                                                  | $CDF_{\text{low}}$ : 1%<br>$CDF_{\text{high}}$ : 99%                          | 56                                                                      | 78                                              | 1.81                                     | 83                                                                 | 0*      |
| II. Postoperative elevation of upper thresholds  | $PO_{\text{increase}}$ : 5% for HR/RR<br>$PO_{\text{increase}}$ : 1% for T    | 33                                                                      | 56                                              | 0.42                                     | 45                                                                 | -1*     |
|                                                  | $PO_{\text{increase}}$ : 10% for HR/RR<br>$PO_{\text{increase}}$ : 2.5% for T | 28                                                                      | 56                                              | 0.40                                     | 40                                                                 | -2      |
|                                                  | $PO_{\text{increase}}$ : 25% for HR/RR<br>$PO_{\text{increase}}$ : 5% for T   | 22                                                                      | 33                                              | 0.35                                     | 41                                                                 | -2      |
| III. Increase annunciation delay interval        | $L_{\text{interval}}$ : 12 samples                                            | 33                                                                      | 50                                              | 0.25                                     | 50                                                                 | 0*      |
|                                                  | $L_{\text{interval}}$ : 17 samples                                            | 28                                                                      | 44                                              | 0.16                                     | 50                                                                 | -1      |
|                                                  | $L_{\text{interval}}$ : 22 samples                                            | 28                                                                      | 44                                              | 0.14                                     | 52                                                                 | -1      |
| IV. Daytime elevation of upper HR/RR thresholds  | $DT_{\text{increase}}$ : 5% for HR<br>$DT_{\text{increase}}$ : 15% for RR     | 33                                                                      | 50                                              | 0.35                                     | 66                                                                 | -1*     |
|                                                  | $DT_{\text{increase}}$ : 10% for HR<br>$DT_{\text{increase}}$ : 25% for RR    | 28                                                                      | 50                                              | 0.32                                     | 67                                                                 | -2      |
|                                                  | $DT_{\text{increase}}$ : 25% for HR<br>$DT_{\text{increase}}$ : 35% for RR    | 22                                                                      | 44                                              | 0.29                                     | 63                                                                 | -2      |
| V. Nighttime reduction of lower HR/RR thresholds | $NT_{\text{increase}}$ : 5% for HR<br>$NT_{\text{increase}}$ : 15% for RR     | 39                                                                      | 61                                              | 0.46                                     | 55                                                                 | 1       |
|                                                  | $NT_{\text{increase}}$ : 10% for HR<br>$NT_{\text{increase}}$ : 25% for RR    | 39                                                                      | 61                                              | 0.45                                     | 55                                                                 | 1*      |
|                                                  | $NT_{\text{increase}}$ : 25% for HR<br>$NT_{\text{increase}}$ : 35% for RR    | 39                                                                      | 61                                              | 0.45                                     | 55                                                                 | 1       |
| VI. Slope-based alarms                           | $T_{\text{slope}}$ : 4 h                                                      | 50                                                                      | 78                                              | 3.5                                      | 94                                                                 | 0*      |
|                                                  | $T_{\text{slope}}$ : 8 h                                                      | 6                                                                       | 17                                              | 0.7                                      | 97                                                                 | -4      |
|                                                  | $T_{\text{slope}}$ : 12 h                                                     | 6                                                                       | 17                                              | 0.3                                      | 88                                                                 | -2      |

For definition of alarm strategies (I–VI) and corresponding parameters see Table 1 of the manuscript.  $S_{\text{total}}$ : sensitivity for detection of adverse events,  $S_{\text{early}}$ : sensitivity for early detection of adverse events, P-score: performance score (for specification see Table 2 of manuscript), AE: adverse event (N=18), TP: True positive alarm,  $TP_{\text{early}}$ : true positive alarm presenting before presentation of the adverse event, N.A.: Not applicable. \*selected as setting with best performance

**Table 7** Performance of combined alternative alarm strategies

| I | II | III | IV | V | S <sub>early</sub><br>(% of AEs<br>preceded<br>by TP <sub>early</sub><br>alarms) | S <sub>total</sub><br>(% of<br>AEs with<br>TP<br>alarms) | Total<br>alarm<br>rate<br>(alarms/<br>patient/<br>day) | False<br>detection<br>rate<br>(% of<br>alarms<br>classified<br>as false<br>positive) | P-score |
|---|----|-----|----|---|----------------------------------------------------------------------------------|----------------------------------------------------------|--------------------------------------------------------|--------------------------------------------------------------------------------------|---------|
| x | x  | x   | x  | x | 56%                                                                              | 78%                                                      | 2.33                                                   | 91%                                                                                  | 0       |
| x | x  | x   | x  |   | 56%                                                                              | 78%                                                      | 2.31                                                   | 91%                                                                                  | 0       |
| x | x  | x   |    | x | 56%                                                                              | 78%                                                      | 2.12                                                   | 92%                                                                                  | 0       |
| x | x  |     | x  | x | 67%                                                                              | 83%                                                      | 3.03                                                   | 91%                                                                                  | 0       |
| x |    | x   | x  | x | 44%                                                                              | 56%                                                      | 0.85                                                   | 80%                                                                                  | 1       |
|   | x  | x   | x  | x | 56%                                                                              | 67%                                                      | 0.55                                                   | 75%                                                                                  | 2       |
| x | x  | x   |    |   | 56%                                                                              | 78%                                                      | 2.10                                                   | 91%                                                                                  | 0       |
| x | x  |     |    | x | 67%                                                                              | 83%                                                      | 2.83                                                   | 92%                                                                                  | 0       |
| x |    |     | x  | x | 61%                                                                              | 72%                                                      | 1.53                                                   | 83%                                                                                  | 0       |
|   |    | x   | x  | x | 28%                                                                              | 44%                                                      | 0.18                                                   | 50%                                                                                  | -1      |
|   | x  | x   | x  |   | 56%                                                                              | 67%                                                      | 0.58                                                   | 76%                                                                                  | 2       |
| x |    | x   |    | x | 56%                                                                              | 72%                                                      | 1.03                                                   | 81%                                                                                  | 0       |
|   | x  |     | x  | x | 61%                                                                              | 72%                                                      | 0.65                                                   | 74%                                                                                  | 2       |
| x |    | x   | x  |   | 44%                                                                              | 56%                                                      | 0.83                                                   | 80%                                                                                  | 1       |
| x | x  |     | x  |   | 67%                                                                              | 83%                                                      | 2.96                                                   | 91%                                                                                  | 1       |
|   | x  | x   |    | x | 61%                                                                              | 72%                                                      | 0.59                                                   | 70%                                                                                  | 2       |
| x | x  |     |    |   | 67%                                                                              | 83%                                                      | 2.75                                                   | 91%                                                                                  | 0       |
| x |    | x   |    |   | 56%                                                                              | 72%                                                      | 1.01                                                   | 81%                                                                                  | 0       |
| x |    |     | x  |   | 61%                                                                              | 72%                                                      | 1.45                                                   | 83%                                                                                  | 0       |
| x |    |     |    | x | 61%                                                                              | 78%                                                      | 1.89                                                   | 84%                                                                                  | 0       |
|   | x  | x   |    |   | 61%                                                                              | 72%                                                      | 0.62                                                   | 71%                                                                                  | 2       |
|   | x  |     | x  |   | 61%                                                                              | 72%                                                      | 0.69                                                   | 76%                                                                                  | 2       |
|   | x  |     |    | x | 67%                                                                              | 78%                                                      | 0.76                                                   | 67%                                                                                  | 1       |
|   |    | x   | x  |   | 28%                                                                              | 44%                                                      | 0.20                                                   | 56%                                                                                  | -1      |
|   |    | x   |    | x | 33%                                                                              | 50%                                                      | 0.23                                                   | 45%                                                                                  | 0       |
|   |    |     | x  | x | 33%                                                                              | 50%                                                      | 0.30                                                   | 60%                                                                                  | -1      |

I–V: number of alternative alarm strategy (for definition see Table 1 of manuscript) implemented using optimal parameter settings (as mentioned in Table of manuscript). The crosses indicate that the considering alternative alarm strategy was included in the combination. S<sub>total</sub>: sensitivity for detection of adverse events, S<sub>total</sub>: sensitivity for detection of adverse events, S<sub>early</sub>: sensitivity for early detection of adverse events, P-score: performance score (for specification see Table 2 of manuscript), N.A: Not applicable
